# Supplementary material
Source: Springer Nature journal article supplement (https://www.springermedizin.de/resource/supplementary/12985_2008_391_MOESM1_ESM.pdf/9607984)

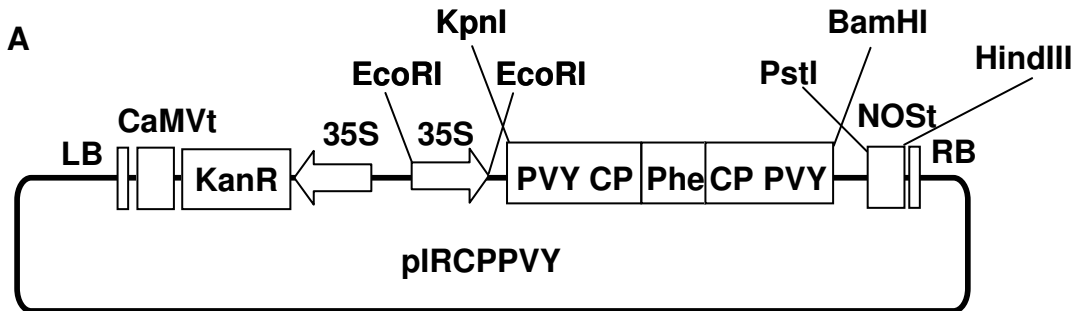

**B**

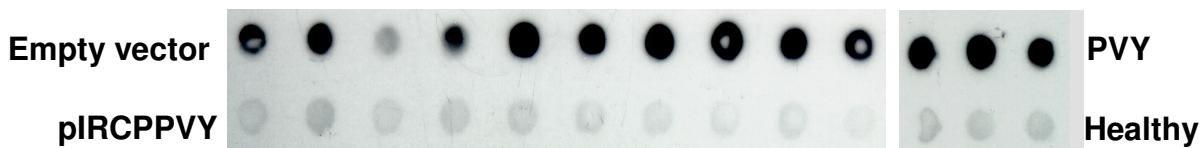

**C**

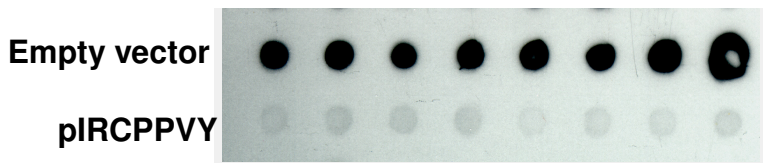

**D**

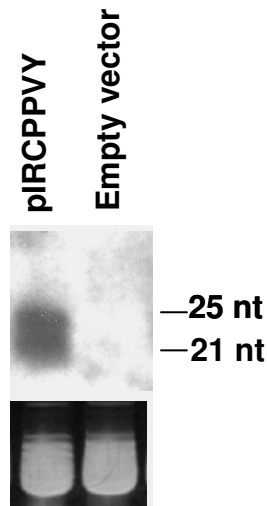

Supplement: MOESM1 [file 9607984]
